# Supplementary material
Source: HighWire-hosted journal article supplement (https://www.cmaj.ca/highwire/filestream/59494/field_highwire_adjunct_files/2/150632-res-3-at.pdf)
Supplement: 150632-res-3-at.pdf [file 150632-res-3-at.pdf]

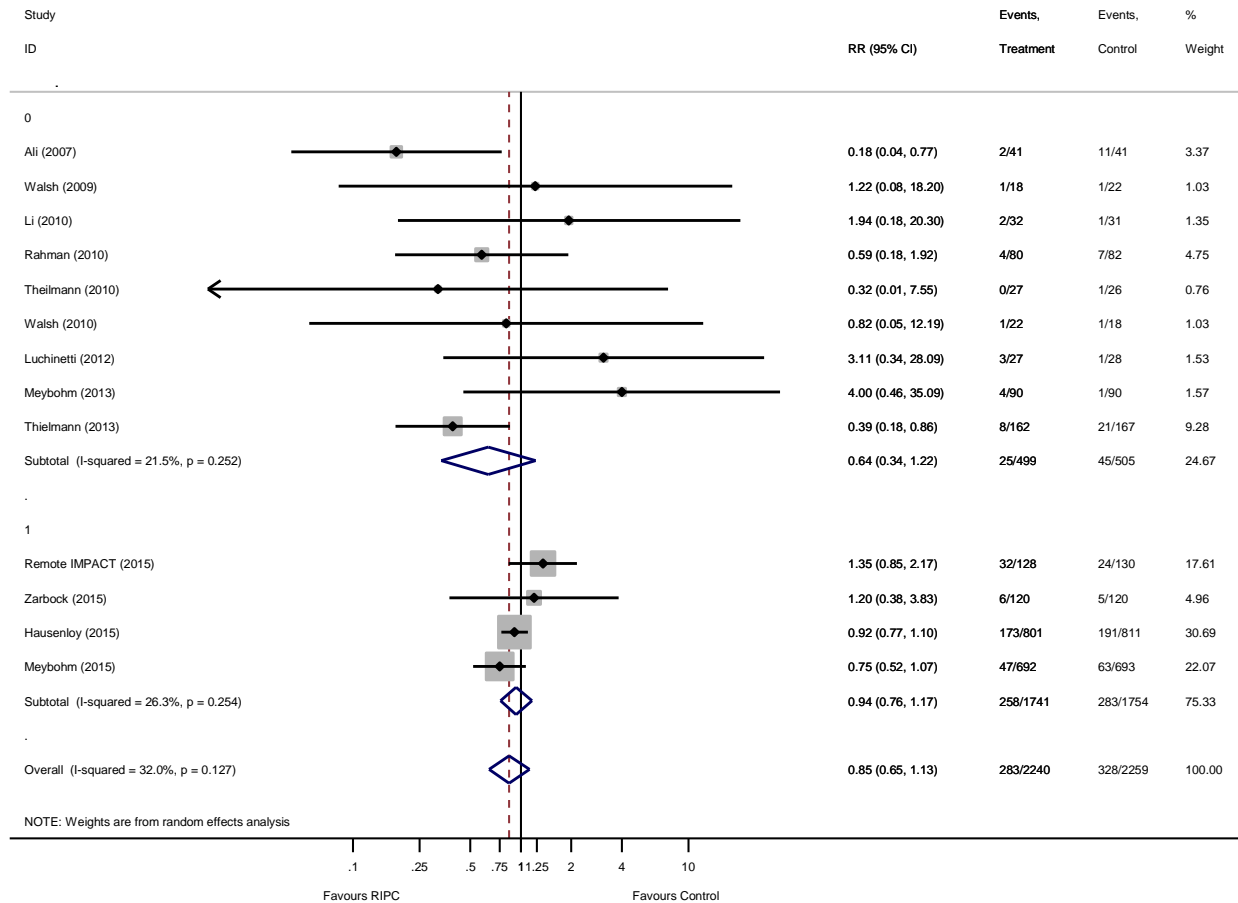

Appendix 3 (as supplied by the authors): Updated results of Healy et al<sup>1</sup> meta-analysis of cardiac surgery patients undergoing remote ischemic preconditioning compared to control on the outcome of myocardial infarction.

### Reference

1. Remote Preconditioning Trialists' Group, Healy DA, Khan WA, Wong CS, et al. Remote preconditioning and major clinical complications following adult cardiovascular surgery: systematic review and meta-analysis. *Int J Cardiol* 2014;176:20-31.
